# Supplementary material for: Gallium-containing polymer brush film as efficient supported Lewis acid catalyst in a glass microreactor
Source: publisher site journal article supplement (doi:10.3762/bjoc.9.194), 2013-08-16
Supplement: Additional file 1 [file 1860-5397-9-194-S1.pdf]

# Supporting information

for

## **Gallium-containing polymer brush film as efficient supported Lewis acid catalyst in a glass microreactor**

Rajesh Munirathinam<sup>1</sup>, Roberto Ricciardi<sup>1</sup>, Richard J. M. Egberink<sup>1</sup>, Jurriaan Huskens<sup>1</sup>, Michael Holtkamp<sup>2</sup>, Herbert Wormeester<sup>3</sup>, Uwe Karst<sup>2</sup> and Willem Verboom\*<sup>1</sup>

Address: <sup>1</sup>Laboratory of Molecular Nanofabrication, MESA+ Institute for Nanotechnology, University of Twente, P.O. Box 217, 7500 AE Enschede, The Netherlands, <sup>2</sup>University of Münster, Institute of Inorganic and Analytical Chemistry, Corrensstr. 28/30, 48149 Münster, Germany, and <sup>3</sup>Laboratory of Physics of Interfaces and Nanomaterials, MESA+ Institute for Nanotechnology, University of Twente, P.O. Box 217, 7500 AE Enschede, The Netherlands.

Email: Willem Verboom\* - w.verboom@utwente.nl

\* Corresponding author

**Conversion of cinnamaldehyde oxime (1, 25  $\mu$ M in acetonitrile) catalyzed by gallium in a microreactor at different temperatures.**

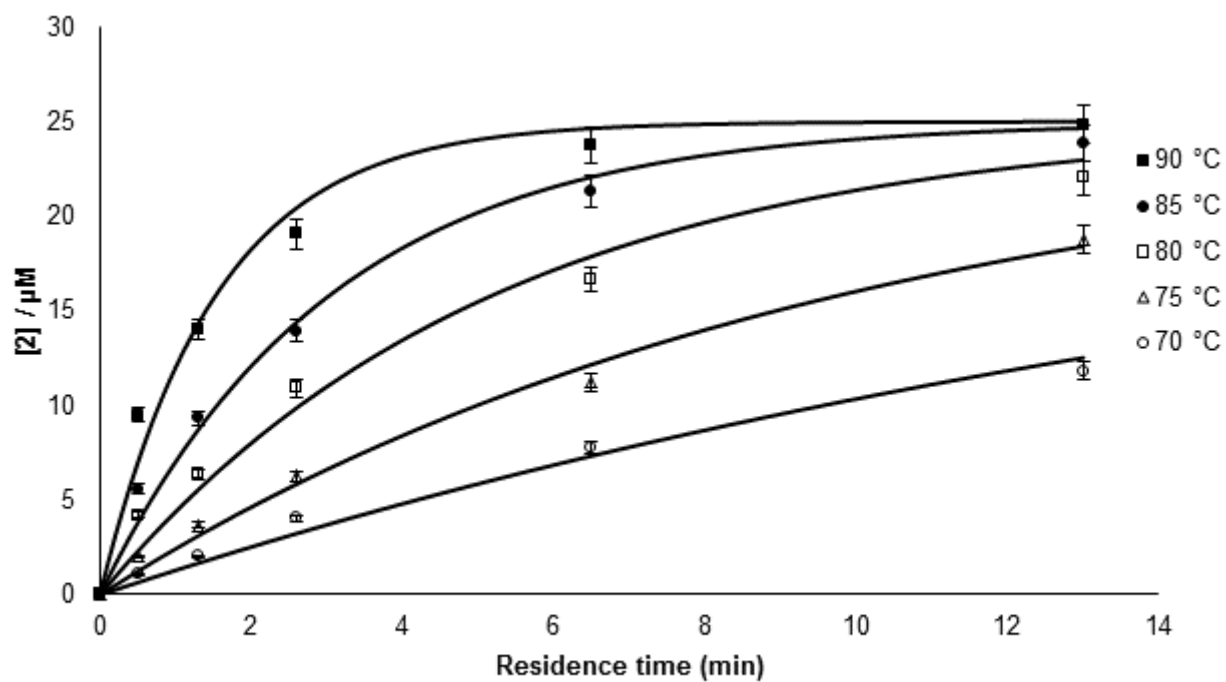

**Figure 1:** Conversion of cinnamaldehyde oxime (**1**, 25 μM in acetonitrile) catalyzed by gallium in a microreactor at different temperatures.
